# Supplementary material for: Modeling the Environmental Suitability for Aedes (Stegomyia) aegypti and Aedes (Stegomyia) albopictus (Diptera: Culicidae) in the Contiguous United States
Source: Oxford University Press journal article supplement (doi:10.1093/jme/tjx163), 2017-09-21
Supplement: tjx163_suppl_supplemental_table.docx [file tjx163_suppl_supplemental_table.docx]

**Supplementary Table.**Source references for *Aedes aegypti* and *Aedes albopictus* presence records by county, 1960-2016.

|  | **Sources** | |
| --- | --- | --- |
| **State and county** | ***Aedes albopictus*** | ***Aedes aegypti*** |
| Alabama |  |  |
| Autauga | Hahn *et al.*(2016) |  |
| Baldwin | Kraemer *et al.*(2016) |  |
| Barbour | Kraemer *et al.*(2016) |  |
| Bibb | Hahn *et al.*(2016) |  |
| Blount | Hahn *et al.*(2016) |  |
| Bullock | Hahn *et al.*(2016) |  |
| Butler | Kraemer *et al.*(2016) |  |
| Calhoun | Hahn *et al.*(2016) | Kraemer *et al.*(2016) |
| Chambers | Hahn *et al.*(2016) |  |
| Cherokee | Hahn *et al.*(2016) |  |
| Chilton | Hahn *et al.*(2016) |  |
| Choctaw | Kraemer *et al.*(2016) |  |
| Clarke | Kraemer *et al.*(2016) |  |
| Clay | Hahn *et al.*(2016) |  |
| Cleburne | Kraemer *et al.*(2016) |  |
| Coffee | Kraemer *et al.*(2016) |  |
| Colbert | Kraemer *et al.*(2016) |  |
| Conecuh | Kraemer *et al.*(2016) |  |
| Coosa | Kraemer *et al.*(2016) |  |
| Covington | Kraemer *et al.*(2016) |  |
| Crenshaw | Hahn *et al.*(2016) |  |
| Cullman | Kraemer *et al.*(2016) |  |
| Dale | ArboNET | Kraemer *et al.*(2016) |
| Dallas | Kraemer *et al.*(2016) |  |
| De Kalb | Kraemer *et al.*(2016) |  |
| Elmore | ArboNET |  |
| Escambia | Kraemer *et al.*(2016) |  |
| Etowah | Kraemer *et al.*(2016) |  |
| Fayette | Hahn *et al.*(2016) |  |
| Franklin | Hahn *et al.*(2016) |  |
| Geneva | Kraemer *et al.*(2016) |  |
| Greene | Hahn *et al.*(2016) |  |
| Hale | Hahn *et al.*(2016) |  |
| Henry | Kraemer *et al.*(2016) |  |
| Houston | Kraemer *et al.*(2016) |  |
| Jackson | Kraemer *et al.*(2016) |  |
| Jefferson | Kraemer *et al.*(2016) |  |
| Lamar | Hahn *et al.*(2016) |  |
| Lauderdale | Kraemer *et al.*(2016) |  |
| Lawrence | Kraemer *et al.*(2016) |  |
| Lee | Kraemer *et al.*(2016) |  |
| Limestone | Hahn *et al.*(2016) |  |
| Lowndes | Kraemer *et al.*(2016) |  |
| Macon | Kraemer *et al.*(2016) |  |
| Madison | Hahn *et al.*(2017) | Hahn *et al.*(2017) |
| Marengo | Kraemer *et al.*(2016) |  |
| Marion | Kraemer *et al.*(2016) |  |
| Marshall | Kraemer *et al.*(2016) |  |
| Mobile | Kraemer *et al.*(2016) | Kraemer *et al.*(2016) |
| Monroe | Kraemer *et al.*(2016) |  |
| Montgomery | Kraemer *et al.*(2016) | Kraemer *et al.*(2016) |
| Morgan | Hahn *et al.*(2016) |  |
| Perry | Kraemer *et al.*(2016) |  |
| Pickens | Hahn *et al.*(2016) |  |
| Pike | Hahn *et al.*(2016) |  |
| Randolph | Hahn *et al.*(2016) |  |
| Russell | Kraemer *et al.*(2016) |  |
| Shelby | Kraemer *et al.*(2016) |  |
| St. Clair | Hahn *et al.*(2016) |  |
| Sumter | Kraemer *et al.*(2016) |  |
| Talladega | Hahn *et al.*(2016) |  |
| Tallapoosa | Hahn *et al.*(2016) |  |
| Tuscaloosa | Hahn *et al.*(2016) | Kraemer *et al.*(2016) |
| Walker | Hahn *et al.*(2016) |  |
| Washington | Kraemer *et al.*(2016) |  |
| Wilcox | Hahn *et al.*(2016) |  |
| Winston | Hahn *et al.*(2016) |  |
| Arizona |  |  |
| Cochise |  | Kraemer *et al.*(2016) |
| Gila |  | Hahn *et al.*(2016) |
| Graham |  | ArboNET |
| Maricopa | ArboNET | Kraemer *et al.*(2016) |
| Mohave |  | ArboNET |
| Pima |  | Kraemer *et al.*(2016) |
| Pinal |  | Kraemer *et al.*(2016) |
| Santa Cruz |  | Kraemer *et al.*(2016) |
| Yavapai |  | Kraemer *et al.*(2016) |
| Yuma | ArboNET | Hahn *et al.*(2016) |
| Arkansas |  |  |
| Ashley | Kraemer *et al.*(2016) |  |
| Baxter | ArboNET |  |
| Benton | Kraemer *et al.*(2016) | Kraemer *et al.*(2016) |
| Boone | ArboNET |  |
| Bradley | Hahn *et al.*(2017) |  |
| Carroll | ArboNET |  |
| Chicot | Hahn *et al.*(2017) |  |
| Clark | Hahn *et al.*(2017) |  |
| Cleburne | Hahn *et al.*(2017) |  |
| Conway | Hahn *et al.*(2017) |  |
| Craighead | Kraemer *et al.*(2016) |  |
| Crawford | Hahn *et al.*(2017) |  |
| Desha | ArboNET | ArboNET |
| Drew | Hahn *et al.*(2017) |  |
| Faulkner | ArboNET |  |
| Garland | ArboNET |  |
| Grant | Kraemer *et al.*(2016) |  |
| Greene | ArboNET |  |
| Hot Spring | Hahn *et al.*(2017) |  |
| Howard | Hahn *et al.*(2017) |  |
| Jefferson | Kraemer *et al.*(2016) | ArboNET |
| Johnson | Hahn *et al.*(2017) |  |
| Little River | Hahn *et al.*(2017) |  |
| Logan | Hahn *et al.*(2017) |  |
| Lonoke | ArboNET |  |
| Miller | Kraemer *et al.*(2016) |  |
| Mississippi | Kraemer *et al.*(2016) |  |
| Montgomery | Hahn *et al.*(2017) |  |
| Ouachita | ArboNET |  |
| Phillips | ArboNET |  |
| Polk | Hahn *et al.*(2017) |  |
| Pulaski | Kraemer *et al.*(2016) | Kraemer *et al.*(2016) |
| Saline | ArboNET |  |
| Searcy | Hahn *et al.*(2017) |  |
| Sebastian | Kraemer *et al.*(2016) |  |
| St. Francis | ArboNET |  |
| Union | ArboNET |  |
| Van Buren | Hahn *et al.*(2017) |  |
| Washington | ArboNET |  |
| White | Kraemer *et al.*(2016) |  |
| Yell | Hahn *et al.*(2017) |  |
| California |  |  |
| Alameda |  | Hahn *et al.*(2016) |
| Fresno |  | Hahn *et al.*(2016) |
| Imperial |  | Hahn *et al.*(2016) |
| Kern | Hahn *et al.*(2016) | Hahn *et al.*(2016) |
| Los Angeles | Hahn *et al.*(2016) | Hahn *et al.*(2017) |
| Madera |  | Hahn *et al.*(2016) |
| Orange | Kraemer *et al.*(2016) | Hahn *et al.*(2016) |
| Riverside |  | Hahn *et al.*(2016) |
| San Bernardino | Hahn *et al.*(2016) | Hahn *et al.*(2016) |
| San Diego | Kraemer *et al.*(2016) | Hahn *et al.*(2016) |
| San Joaquin | ArboNET |  |
| San Mateo | Kraemer *et al.*(2016) | Hahn *et al.*(2016) |
| Santa Clara | Hahn *et al.*(2016) |  |
| Tulare |  | Hahn *et al.*(2016) |
| Colorado |  |  |
| Mesa | Hahn *et al.*(2016) |  |
| Pueblo |  | Hahn *et al.*(2016) |
| Weld | Hahn *et al.*(2016) |  |
| Connecticut |  |  |
| Fairfield | Hahn *et al.*(2016) |  |
| Hartford | Hahn *et al.*(2017) |  |
| New Haven | Hahn *et al.*(2016) |  |
| Delaware |  |  |
| Kent | Kraemer *et al.*(2016) | Hahn *et al.*(2016) |
| New Castle | Kraemer *et al.*(2016) |  |
| Sussex | Kraemer *et al.*(2016) | Hahn *et al.*(2016) |
| District of Columbia |  |  |
| Washington | Kraemer *et al.*(2016) | Hahn *et al.*(2016) |
| Florida |  |  |
| Alachua | Kraemer *et al.*(2016) | Kraemer *et al.*(2016) |
| Baker | Kraemer *et al.*(2016) | Kraemer *et al.*(2016) |
| Bay | Kraemer *et al.*(2016) | Kraemer *et al.*(2016) |
| Bradford | Kraemer *et al.*(2016) | Kraemer *et al.*(2016) |
| Brevard | Kraemer *et al.*(2016) | Kraemer *et al.*(2016) |
| Broward | Kraemer *et al.*(2016) | Kraemer *et al.*(2016) |
| Calhoun | Kraemer *et al.*(2016) |  |
| Charlotte | Kraemer *et al.*(2016) | Kraemer *et al.*(2016) |
| Citrus | Kraemer *et al.*(2016) | Hahn *et al.*(2016) |
| Clay | Kraemer *et al.*(2016) | Kraemer *et al.*(2016) |
| Collier | Kraemer *et al.*(2016) | Kraemer *et al.*(2016) |
| Columbia | Kraemer *et al.*(2016) |  |
| Dade | Kraemer *et al.*(2016) | Kraemer *et al.*(2016) |
| De Soto | Kraemer *et al.*(2016) | Kraemer *et al.*(2016) |
| Dixie | Kraemer *et al.*(2016) |  |
| Duval | Kraemer *et al.*(2016) | Kraemer *et al.*(2016) |
| Escambia | Kraemer *et al.*(2016) | Kraemer *et al.*(2016) |
| Flagler | Kraemer *et al.*(2016) | Kraemer *et al.*(2016) |
| Franklin | Kraemer *et al.*(2016) |  |
| Gadsden | Kraemer *et al.*(2016) |  |
| Gilchrist | Kraemer *et al.*(2016) |  |
| Glades | Kraemer *et al.*(2016) | Kraemer *et al.*(2016) |
| Gulf | Kraemer *et al.*(2016) |  |
| Hamilton | Kraemer *et al.*(2016) |  |
| Hardee | Kraemer *et al.*(2016) | Kraemer *et al.*(2016) |
| Hendry | Kraemer *et al.*(2016) | Kraemer *et al.*(2016) |
| Hernando | Kraemer *et al.*(2016) | Hahn *et al.*(2016) |
| Highlands | Kraemer *et al.*(2016) | Kraemer *et al.*(2016) |
| Hillsborough | Kraemer *et al.*(2016) | Kraemer *et al.*(2016) |
| Holmes | Kraemer *et al.*(2016) |  |
| Indian River | Kraemer *et al.*(2016) | Kraemer *et al.*(2016) |
| Jackson | Kraemer *et al.*(2016) |  |
| Jefferson | Kraemer *et al.*(2016) |  |
| Lafayette | Kraemer *et al.*(2016) |  |
| Lake | Kraemer *et al.*(2016) | Kraemer *et al.*(2016) |
| Lee | Kraemer *et al.*(2016) | Kraemer *et al.*(2016) |
| Leon | Kraemer *et al.*(2016) |  |
| Levy | Kraemer *et al.*(2016) | Kraemer *et al.*(2016) |
| Liberty | Kraemer *et al.*(2016) |  |
| Madison | Kraemer *et al.*(2016) |  |
| Manatee | Kraemer *et al.*(2016) | Kraemer *et al.*(2016) |
| Marion | Kraemer *et al.*(2016) | Kraemer *et al.*(2016) |
| Martin | Kraemer *et al.*(2016) | Kraemer *et al.*(2016) |
| Monroe | Kraemer *et al.*(2016) | Kraemer *et al.*(2016) |
| Nassau | Kraemer *et al.*(2016) | Kraemer *et al.*(2016) |
| Okaloosa | Kraemer *et al.*(2016) |  |
| Okeechobee | Kraemer *et al.*(2016) | Kraemer *et al.*(2016) |
| Orange | Kraemer *et al.*(2016) | Kraemer *et al.*(2016) |
| Osceola | Kraemer *et al.*(2016) | Kraemer *et al.*(2016) |
| Palm Beach | Kraemer *et al.*(2016) | Kraemer *et al.*(2016) |
| Pasco | Kraemer *et al.*(2016) | Kraemer *et al.*(2016) |
| Pinellas | Hahn *et al.*(2017) | Hahn *et al.*(2017) |
| Polk | Kraemer *et al.*(2016) | Kraemer *et al.*(2016) |
| Putnam | Kraemer *et al.*(2016) | Kraemer *et al.*(2016) |
| Santa Rosa | Kraemer *et al.*(2016) | Kraemer *et al.*(2016) |
| Sarasota | Kraemer *et al.*(2016) | Kraemer *et al.*(2016) |
| Seminole | Kraemer *et al.*(2016) | Kraemer *et al.*(2016) |
| St. Johns | Kraemer *et al.*(2016) | Kraemer *et al.*(2016) |
| St. Lucie | Kraemer *et al.*(2016) | Kraemer *et al.*(2016) |
| Sumter | Kraemer *et al.*(2016) |  |
| Suwannee | Kraemer *et al.*(2016) |  |
| Taylor | Kraemer *et al.*(2016) |  |
| Union | Kraemer *et al.*(2016) |  |
| Volusia | Kraemer *et al.*(2016) | Kraemer *et al.*(2016) |
| Wakulla | Kraemer *et al.*(2016) |  |
| Walton | Kraemer *et al.*(2016) |  |
| Washington | Kraemer *et al.*(2016) |  |
| Georgia |  |  |
| Appling | Kraemer *et al.*(2016) |  |
| Atkinson | Kraemer *et al.*(2016) |  |
| Bacon | Kraemer *et al.*(2016) |  |
| Baker | Kraemer *et al.*(2016) |  |
| Baldwin | Kraemer *et al.*(2016) |  |
| Banks | Kraemer *et al.*(2016) |  |
| Barrow | Kraemer *et al.*(2016) |  |
| Bartow | Kraemer *et al.*(2016) |  |
| Ben Hill | Kraemer *et al.*(2016) |  |
| Berrien | Kraemer *et al.*(2016) |  |
| Bibb | Kraemer *et al.*(2016) |  |
| Bleckley | Kraemer *et al.*(2016) |  |
| Brantley | Kraemer *et al.*(2016) |  |
| Brooks | Kraemer *et al.*(2016) |  |
| Bryan | Kraemer *et al.*(2016) |  |
| Bulloch | Kraemer *et al.*(2016) |  |
| Burke | Kraemer *et al.*(2016) |  |
| Butts | Kraemer *et al.*(2016) |  |
| Calhoun | Kraemer *et al.*(2016) |  |
| Camden | Kraemer *et al.*(2016) |  |
| Candler | Kraemer *et al.*(2016) |  |
| Carroll | Kraemer *et al.*(2016) |  |
| Catoosa | Kraemer *et al.*(2016) |  |
| Charlton | Kraemer *et al.*(2016) |  |
| Chatham | Kraemer *et al.*(2016) | Kraemer *et al.*(2016) |
| Chattahoochee | Kraemer *et al.*(2016) | Kraemer *et al.*(2016) |
| Chattooga | Kraemer *et al.*(2016) |  |
| Cherokee | Kraemer *et al.*(2016) |  |
| Clarke | Kraemer *et al.*(2016) |  |
| Clay | Kraemer *et al.*(2016) |  |
| Clayton | Kraemer *et al.*(2016) |  |
| Clinch | Kraemer *et al.*(2016) |  |
| Cobb | Kraemer *et al.*(2016) |  |
| Coffee | Kraemer *et al.*(2016) |  |
| Colquitt | Kraemer *et al.*(2016) |  |
| Columbia | Kraemer *et al.*(2016) |  |
| Cook | Kraemer *et al.*(2016) |  |
| Coweta | Kraemer *et al.*(2016) |  |
| Crawford | Kraemer *et al.*(2016) |  |
| Crisp | Kraemer *et al.*(2016) |  |
| Dade | Kraemer *et al.*(2016) |  |
| Dawson | Kraemer *et al.*(2016) |  |
| De Kalb | Kraemer *et al.*(2016) |  |
| Decatur | Kraemer *et al.*(2016) |  |
| Dodge | Kraemer *et al.*(2016) |  |
| Dooly | Kraemer *et al.*(2016) |  |
| Dougherty | Kraemer *et al.*(2016) |  |
| Douglas | Kraemer *et al.*(2016) |  |
| Early | Kraemer *et al.*(2016) |  |
| Echols | Kraemer *et al.*(2016) |  |
| Effingham | Kraemer *et al.*(2016) |  |
| Elbert | Kraemer *et al.*(2016) |  |
| Emanuel | Kraemer *et al.*(2016) |  |
| Evans | Kraemer *et al.*(2016) |  |
| Fannin | Kraemer *et al.*(2016) |  |
| Fayette | Kraemer *et al.*(2016) |  |
| Floyd | Kraemer *et al.*(2016) |  |
| Forsyth | Kraemer *et al.*(2016) |  |
| Franklin | Kraemer *et al.*(2016) |  |
| Fulton | Kraemer *et al.*(2016) | Kraemer *et al.*(2016) |
| Gilmer | Kraemer *et al.*(2016) |  |
| Glascock | Kraemer *et al.*(2016) |  |
| Glynn | Kraemer *et al.*(2016) |  |
| Gordon | Kraemer *et al.*(2016) |  |
| Grady | Kraemer *et al.*(2016) |  |
| Greene | Kraemer *et al.*(2016) |  |
| Gwinnett | Kraemer *et al.*(2016) |  |
| Habersham | Kraemer *et al.*(2016) |  |
| Hall | Kraemer *et al.*(2016) |  |
| Hancock | Kraemer *et al.*(2016) |  |
| Haralson | Kraemer *et al.*(2016) |  |
| Harris | Kraemer *et al.*(2016) |  |
| Hart | Kraemer *et al.*(2016) |  |
| Heard | Kraemer *et al.*(2016) |  |
| Henry | Kraemer *et al.*(2016) |  |
| Houston | Kraemer *et al.*(2016) |  |
| Irwin | Kraemer *et al.*(2016) |  |
| Jackson | Kraemer *et al.*(2016) |  |
| Jasper | Kraemer *et al.*(2016) |  |
| Jeff Davis | Kraemer *et al.*(2016) |  |
| Jefferson | Kraemer *et al.*(2016) |  |
| Jenkins | Kraemer *et al.*(2016) |  |
| Johnson | Kraemer *et al.*(2016) |  |
| Jones | Kraemer *et al.*(2016) |  |
| Lamar | Kraemer *et al.*(2016) |  |
| Lanier | Kraemer *et al.*(2016) |  |
| Laurens | Kraemer *et al.*(2016) |  |
| Lee | Kraemer *et al.*(2016) |  |
| Liberty | Kraemer *et al.*(2016) | Kraemer *et al.*(2016) |
| Lincoln | Kraemer *et al.*(2016) |  |
| Long | Kraemer *et al.*(2016) |  |
| Lowndes | Kraemer *et al.*(2016) |  |
| Lumpkin | Kraemer *et al.*(2016) |  |
| Macon | Kraemer *et al.*(2016) |  |
| Madison | Kraemer *et al.*(2016) |  |
| Marion | Kraemer *et al.*(2016) |  |
| McDuffie | Kraemer *et al.*(2016) |  |
| McIntosh | Kraemer *et al.*(2016) |  |
| Meriwether | Kraemer *et al.*(2016) |  |
| Miller | Kraemer *et al.*(2016) |  |
| Mitchell | Kraemer *et al.*(2016) |  |
| Monroe | Kraemer *et al.*(2016) |  |
| Montgomery | Kraemer *et al.*(2016) |  |
| Morgan | Kraemer *et al.*(2016) |  |
| Murray | Kraemer *et al.*(2016) |  |
| Muscogee | Kraemer *et al.*(2016) | Hahn *et al.*(2016) |
| Newton | Kraemer *et al.*(2016) |  |
| Oconee | Kraemer *et al.*(2016) |  |
| Oglethorpe | Kraemer *et al.*(2016) |  |
| Paulding | Kraemer *et al.*(2016) |  |
| Peach | Kraemer *et al.*(2016) |  |
| Pickens | Kraemer *et al.*(2016) |  |
| Pierce | Kraemer *et al.*(2016) |  |
| Pike | Kraemer *et al.*(2016) |  |
| Polk | Kraemer *et al.*(2016) |  |
| Pulaski | Kraemer *et al.*(2016) |  |
| Putnam | Kraemer *et al.*(2016) |  |
| Quitman | Kraemer *et al.*(2016) |  |
| Rabun | Kraemer *et al.*(2016) |  |
| Randolph | Kraemer *et al.*(2016) |  |
| Richmond | Kraemer *et al.*(2016) | Kraemer *et al.*(2016) |
| Rockdale | Kraemer *et al.*(2016) |  |
| Schley | Kraemer *et al.*(2016) |  |
| Screven | Kraemer *et al.*(2016) |  |
| Seminole | Kraemer *et al.*(2016) |  |
| Spalding | Kraemer *et al.*(2016) |  |
| Stephens | Kraemer *et al.*(2016) |  |
| Stewart | Kraemer *et al.*(2016) |  |
| Sumter | Kraemer *et al.*(2016) |  |
| Talbot | Kraemer *et al.*(2016) | ArboNET |
| Taliaferro | Kraemer *et al.*(2016) |  |
| Tattnall | Kraemer *et al.*(2016) |  |
| Taylor | Kraemer *et al.*(2016) |  |
| Telfair | Kraemer *et al.*(2016) |  |
| Terrell | Kraemer *et al.*(2016) |  |
| Thomas | Kraemer *et al.*(2016) |  |
| Tift | Kraemer *et al.*(2016) |  |
| Toombs | Kraemer *et al.*(2016) |  |
| Towns | Kraemer *et al.*(2016) |  |
| Treutlen | Kraemer *et al.*(2016) |  |
| Troup | Kraemer *et al.*(2016) |  |
| Turner | Kraemer *et al.*(2016) |  |
| Twiggs | Kraemer *et al.*(2016) |  |
| Union | Kraemer *et al.*(2016) |  |
| Upson | Kraemer *et al.*(2016) |  |
| Walker | Kraemer *et al.*(2016) |  |
| Walton | Kraemer *et al.*(2016) |  |
| Ware | Kraemer *et al.*(2016) | Kraemer *et al.*(2016) |
| Warren | Kraemer *et al.*(2016) |  |
| Washington | Kraemer *et al.*(2016) |  |
| Wayne | Kraemer *et al.*(2016) |  |
| Webster | Kraemer *et al.*(2016) |  |
| Wheeler | Kraemer *et al.*(2016) |  |
| White | Kraemer *et al.*(2016) |  |
| Whitfield | Kraemer *et al.*(2016) |  |
| Wilcox | Kraemer *et al.*(2016) |  |
| Wilkes | Kraemer *et al.*(2016) |  |
| Wilkinson | Kraemer *et al.*(2016) |  |
| Worth | Kraemer *et al.*(2016) |  |
| Illinois |  |  |
| Adams | Hahn *et al.*(2016) |  |
| Alexander | Kraemer *et al.*(2016) |  |
| Champaign | Hahn *et al.*(2016) |  |
| Christian | Hahn *et al.*(2016) |  |
| Clay | Hahn *et al.*(2016) |  |
| Coles | Hahn *et al.*(2017) |  |
| Cook | Kraemer *et al.*(2016) | Kraemer *et al.*(2016) |
| De Witt | Hahn *et al.*(2016) |  |
| Douglas | Hahn *et al.*(2017) |  |
| Effingham | Hahn *et al.*(2016) |  |
| Fayette | Hahn *et al.*(2016) |  |
| Franklin | Hahn *et al.*(2017) |  |
| Gallatin | Kraemer *et al.*(2016) |  |
| Hamilton | Hahn *et al.*(2016) |  |
| Jackson | Kraemer *et al.*(2016) |  |
| Jasper | Kraemer *et al.*(2016) |  |
| Jefferson | Kraemer *et al.*(2016) |  |
| Jersey | Hahn *et al.*(2016) |  |
| Johnson | Kraemer *et al.*(2016) |  |
| Kankakee |  | Clarke County Mosquito Control Association and Kanakee Department of Health |
| Logan | Hahn *et al.*(2016) |  |
| Macon | Hahn *et al.*(2016) |  |
| Macoupin | Kraemer *et al.*(2016) |  |
| Madison | Kraemer *et al.*(2016) |  |
| Marion | Hahn *et al.*(2016) |  |
| Massac | Kraemer *et al.*(2016) |  |
| McLean | Hahn *et al.*(2016) |  |
| Menard | Hahn *et al.*(2016) |  |
| Montgomery | Hahn *et al.*(2016) |  |
| Peoria | Kraemer *et al.*(2016) |  |
| Perry | Hahn *et al.*(2016) |  |
| Piatt | Hahn *et al.*(2016) |  |
| Pope | Hahn *et al.*(2016) |  |
| Pulaski | Kraemer *et al.*(2016) |  |
| Randolph | Kraemer *et al.*(2016) |  |
| Richland | Kraemer *et al.*(2016) |  |
| Saline | Hahn *et al.*(2016) |  |
| Sangamon | Hahn *et al.*(2016) |  |
| St. Clair | Kraemer *et al.*(2016) |  |
| Union | Kraemer *et al.*(2016) |  |
| Vermilion | Hahn *et al.*(2016) |  |
| Wabash | Hahn *et al.*(2016) |  |
| White | Hahn *et al.*(2016) |  |
| Williamson | Kraemer *et al.*(2016) |  |
| Indiana |  |  |
| Allen | Hahn *et al.*(2016) |  |
| Bartholomew | Kraemer *et al.*(2016) |  |
| Boone | Hahn *et al.*(2016) |  |
| Brown | Hahn *et al.*(2016) |  |
| Clark | Kraemer *et al.*(2016) |  |
| Clay | Hahn *et al.*(2016) |  |
| Crawford | Kraemer *et al.*(2016) |  |
| Daviess | Kraemer *et al.*(2016) |  |
| De Kalb | Hahn *et al.*(2016) |  |
| Dearborn | Kraemer *et al.*(2016) |  |
| Decatur | Hahn *et al.*(2016) |  |
| Delaware | Hahn *et al.*(2016) |  |
| Dubois | Kraemer *et al.*(2016) |  |
| Fayette | Hahn *et al.*(2016) |  |
| Floyd | Kraemer *et al.*(2016) |  |
| Franklin | Hahn *et al.*(2016) |  |
| Fulton | ArboNET |  |
| Gibson | Kraemer *et al.*(2016) |  |
| Greene | Kraemer *et al.*(2016) |  |
| Hamilton | Hahn *et al.*(2016) |  |
| Hancock | Hahn *et al.*(2016) |  |
| Harrison | Kraemer *et al.*(2016) |  |
| Hendricks | Hahn *et al.*(2016) |  |
| Huntington | Hahn *et al.*(2016) |  |
| Jackson | Kraemer *et al.*(2016) |  |
| Jay | ArboNET |  |
| Jefferson | Kraemer *et al.*(2016) |  |
| Jennings | Kraemer *et al.*(2016) |  |
| Johnson | Hahn *et al.*(2016) |  |
| Knox | Kraemer *et al.*(2016) |  |
| La Porte | ArboNET |  |
| Lawrence | Kraemer *et al.*(2016) |  |
| Madison | Hahn *et al.*(2016) |  |
| Marion | Hahn *et al.*(2017) |  |
| Martin | Kraemer *et al.*(2016) |  |
| Monroe | Hahn *et al.*(2016) |  |
| Montgomery | ArboNET |  |
| Morgan | ArboNET |  |
| Ohio | Kraemer *et al.*(2016) |  |
| Orange | Kraemer *et al.*(2016) |  |
| Owen | Kraemer *et al.*(2016) |  |
| Parke | Hahn *et al.*(2016) |  |
| Perry | Kraemer *et al.*(2016) |  |
| Pike | Kraemer *et al.*(2016) |  |
| Posey | Kraemer *et al.*(2016) |  |
| Putnam | ArboNET |  |
| Randolph | Hahn *et al.*(2016) |  |
| Ripley | Hahn *et al.*(2016) |  |
| Rush | Hahn *et al.*(2016) |  |
| Scott | Kraemer *et al.*(2016) |  |
| Shelby | Kraemer *et al.*(2016) |  |
| Spencer | Kraemer *et al.*(2016) |  |
| St. Joseph | ArboNET |  |
| Sullivan | Kraemer *et al.*(2016) |  |
| Switzerland | Kraemer *et al.*(2016) |  |
| Tippecanoe | Hahn *et al.*(2016) |  |
| Tipton | Hahn *et al.*(2016) |  |
| Vanderburgh | Kraemer *et al.*(2016) | Kraemer *et al.*(2016) |
| Vermillion | Hahn *et al.*(2016) |  |
| Vigo | Hahn *et al.*(2016) |  |
| Warren | Hahn *et al.*(2016) |  |
| Warrick | Kraemer *et al.*(2016) |  |
| Washington | Kraemer *et al.*(2016) |  |
| Wayne | Hahn *et al.*(2016) |  |
| Iowa |  |  |
| Polk | Hahn *et al.*(2016) |  |
| Scott | Hahn *et al.*(2016) |  |
| Story | Hahn *et al.*(2016) |  |
| Kansas |  |  |
| Allen | Hahn *et al.*(2017) |  |
| Anderson | Hahn *et al.*(2017) |  |
| Atchison | Hahn *et al.*(2016) | Hahn *et al.*(2016) |
| Barber | Hahn *et al.*(2017) |  |
| Barton | Hahn *et al.*(2017) |  |
| Bourbon | Hahn *et al.*(2016) | Hahn *et al.*(2016) |
| Brown | Hahn *et al.*(2017) |  |
| Butler | Hahn *et al.*(2016) |  |
| Chase | Hahn *et al.*(2016) |  |
| Chautauqua | Hahn *et al.*(2017) |  |
| Cherokee | Hahn *et al.*(2016) | Hahn *et al.*(2016) |
| Clay | Hahn *et al.*(2017) |  |
| Coffey | Hahn *et al.*(2017) |  |
| Comanche | Hahn *et al.*(2017) |  |
| Cowley | ArboNET |  |
| Crawford | Hahn *et al.*(2017) | Hahn *et al.*(2017) |
| Dickinson | Hahn *et al.*(2017) |  |
| Doniphan | Hahn *et al.*(2016) | Hahn *et al.*(2016) |
| Douglas | Kraemer *et al.*(2016) | Hahn *et al.*(2016) |
| Edwards | Hahn *et al.*(2017) |  |
| Elk | Kraemer *et al.*(2016) |  |
| Ellis | Hahn *et al.*(2017) |  |
| Ellsworth | Hahn *et al.*(2017) |  |
| Finney | Hahn *et al.*(2017) |  |
| Ford | Hahn *et al.*(2017) |  |
| Franklin | Hahn *et al.*(2016) |  |
| Geary | Hahn *et al.*(2017) |  |
| Greenwood | Hahn *et al.*(2017) |  |
| Harper | Hahn *et al.*(2017) |  |
| Harvey | Hahn *et al.*(2017) |  |
| Jackson | Hahn *et al.*(2016) |  |
| Jefferson | Hahn *et al.*(2016) |  |
| Johnson | Kraemer *et al.*(2016) | Hahn *et al.*(2016) |
| Kingman | Hahn *et al.*(2016) |  |
| Kiowa | Hahn *et al.*(2017) |  |
| Labette | Hahn *et al.*(2017) |  |
| Leavenworth | Kraemer *et al.*(2016) |  |
| Linn | Hahn *et al.*(2017) |  |
| Lyon | Hahn *et al.*(2016) |  |
| Marion | Hahn *et al.*(2017) |  |
| Marshall | Hahn *et al.*(2017) |  |
| McPherson | Hahn *et al.*(2017) |  |
| Miami | Hahn *et al.*(2017) |  |
| Montgomery | Kraemer *et al.*(2016) |  |
| Morris | Hahn *et al.*(2016) |  |
| Nemaha | Hahn *et al.*(2017) |  |
| Neosho | Kraemer *et al.*(2016) |  |
| Osage | Hahn *et al.*(2016) |  |
| Ottawa | Hahn *et al.*(2017) |  |
| Pottawatomie | Hahn *et al.*(2016) |  |
| Pratt | Hahn *et al.*(2017) |  |
| Reno | Hahn *et al.*(2017) |  |
| Rice | Hahn *et al.*(2017) |  |
| Riley | VectorMap |  |
| Russell | Hahn *et al.*(2017) |  |
| Saline | Kraemer *et al.*(2016) |  |
| Sedgwick | Kraemer *et al.*(2016) |  |
| Shawnee | Kraemer *et al.*(2016) | Hahn *et al.*(2016) |
| Stafford | Hahn *et al.*(2017) |  |
| Sumner | Hahn *et al.*(2017) |  |
| Wabaunsee | Hahn *et al.*(2017) |  |
| Washington | Hahn *et al.*(2017) |  |
| Wilson | Kraemer *et al.*(2016) |  |
| Woodson | Hahn *et al.*(2017) |  |
| Wyandotte | Kraemer *et al.*(2016) | Hahn *et al.*(2016) |
| Kentucky |  |  |
| Adair | Kraemer *et al.*(2016) |  |
| Allen | Kraemer *et al.*(2016) |  |
| Anderson | Kraemer *et al.*(2016) |  |
| Ballard | Kraemer *et al.*(2016) |  |
| Barren | Kraemer *et al.*(2016) |  |
| Bell | Kraemer *et al.*(2016) |  |
| Boone | Kraemer *et al.*(2016) |  |
| Boyle | Kraemer *et al.*(2016) |  |
| Breathitt | Kraemer *et al.*(2016) |  |
| Breckinridge | Kraemer *et al.*(2016) |  |
| Bullitt | Kraemer *et al.*(2016) |  |
| Butler | Kraemer *et al.*(2016) |  |
| Caldwell | Kraemer *et al.*(2016) |  |
| Calloway | Kraemer *et al.*(2016) |  |
| Campbell | Kraemer *et al.*(2016) | ArboNET |
| Carlisle | Kraemer *et al.*(2016) |  |
| Casey | Kraemer *et al.*(2016) |  |
| Christian | Kraemer *et al.*(2016) |  |
| Clark | Kraemer *et al.*(2016) |  |
| Clay | Kraemer *et al.*(2016) |  |
| Clinton | Kraemer *et al.*(2016) |  |
| Crittenden | Kraemer *et al.*(2016) |  |
| Cumberland | Kraemer *et al.*(2016) |  |
| Daviess | Kraemer *et al.*(2016) |  |
| Edmonson | Kraemer *et al.*(2016) |  |
| Elliott | Kraemer *et al.*(2016) |  |
| Estill | Kraemer *et al.*(2016) |  |
| Fayette | Kraemer *et al.*(2016) | ArboNET |
| Fleming | ArboNET |  |
| Floyd | Kraemer *et al.*(2016) |  |
| Franklin | Kraemer *et al.*(2016) |  |
| Fulton | Kraemer *et al.*(2016) | ArboNET |
| Gallatin | Kraemer *et al.*(2016) |  |
| Garrard | Kraemer *et al.*(2016) |  |
| Grant | ArboNET | ArboNET |
| Graves | Kraemer *et al.*(2016) |  |
| Grayson | Kraemer *et al.*(2016) |  |
| Green | Kraemer *et al.*(2016) |  |
| Hancock | Kraemer *et al.*(2016) |  |
| Hardin | Kraemer *et al.*(2016) |  |
| Hart | Kraemer *et al.*(2016) |  |
| Henderson | Kraemer *et al.*(2016) |  |
| Hickman | Kraemer *et al.*(2016) |  |
| Hopkins | Kraemer *et al.*(2016) |  |
| Jefferson | Kraemer *et al.*(2016) | ArboNET |
| Jessamine | Kraemer *et al.*(2016) |  |
| Kenton | Kraemer *et al.*(2016) |  |
| Larue | Kraemer *et al.*(2016) |  |
| Laurel | Kraemer *et al.*(2016) |  |
| Lee | Kraemer *et al.*(2016) |  |
| Lincoln | Kraemer *et al.*(2016) |  |
| Livingston | Kraemer *et al.*(2016) |  |
| Logan | Kraemer *et al.*(2016) |  |
| Lyon | Kraemer *et al.*(2016) |  |
| Madison | Kraemer *et al.*(2016) |  |
| Magoffin | Kraemer *et al.*(2016) |  |
| Marion | Kraemer *et al.*(2016) |  |
| Marshall | Kraemer *et al.*(2016) |  |
| McCracken | Kraemer *et al.*(2016) |  |
| McCreary | Kraemer *et al.*(2016) |  |
| McLean | Kraemer *et al.*(2016) |  |
| Meade | Kraemer *et al.*(2016) |  |
| Mercer | Kraemer *et al.*(2016) |  |
| Metcalfe | Kraemer *et al.*(2016) |  |
| Monroe | Kraemer *et al.*(2016) |  |
| Montgomery | Kraemer *et al.*(2016) |  |
| Muhlenberg | Kraemer *et al.*(2016) |  |
| Nelson | Kraemer *et al.*(2016) |  |
| Ohio | Kraemer *et al.*(2016) |  |
| Owen | Kraemer *et al.*(2016) |  |
| Perry | Kraemer *et al.*(2016) |  |
| Powell | Kraemer *et al.*(2016) |  |
| Pulaski | Kraemer *et al.*(2016) |  |
| Robertson | Kraemer *et al.*(2016) |  |
| Rockcastle | Kraemer *et al.*(2016) |  |
| Rowan | Kraemer *et al.*(2016) |  |
| Russell | Kraemer *et al.*(2016) |  |
| Scott | Kraemer *et al.*(2016) |  |
| Simpson | Kraemer *et al.*(2016) |  |
| Taylor | Kraemer *et al.*(2016) |  |
| Todd | Kraemer *et al.*(2016) |  |
| Trigg | Kraemer *et al.*(2016) |  |
| Union | Kraemer *et al.*(2016) |  |
| Warren | Kraemer *et al.*(2016) |  |
| Washington | Kraemer *et al.*(2016) |  |
| Wayne | Kraemer *et al.*(2016) |  |
| Webster | Kraemer *et al.*(2016) |  |
| Whitley | Kraemer *et al.*(2016) |  |
| Wolfe | ArboNET |  |
| Woodford | Kraemer *et al.*(2016) |  |
| Louisiana |  |  |
| Acadia | Kraemer *et al.*(2016) |  |
| Allen | Kraemer *et al.*(2016) |  |
| Ascension | Hahn *et al.*(2016) | Hahn *et al.*(2016) |
| Assumption | Kraemer *et al.*(2016) |  |
| Avoyelles | Kraemer *et al.*(2016) |  |
| Beauregard | Kraemer *et al.*(2016) |  |
| Bienville | Kraemer *et al.*(2016) |  |
| Bossier | Kraemer *et al.*(2016) | Kraemer *et al.*(2016) |
| Caddo | Kraemer *et al.*(2016) | Kraemer *et al.*(2016) |
| Calcasieu | Kraemer *et al.*(2016) | Hahn *et al.*(2017) |
| Caldwell | Kraemer *et al.*(2016) |  |
| Cameron | Kraemer *et al.*(2016) |  |
| Catahoula | Kraemer *et al.*(2016) |  |
| Claiborne | Kraemer *et al.*(2016) |  |
| Concordia | Kraemer *et al.*(2016) |  |
| De Soto | Kraemer *et al.*(2016) | Kraemer *et al.*(2016) |
| East Baton Rouge | Kraemer *et al.*(2016) | Hahn *et al.*(2017) |
| East Feliciana | Kraemer *et al.*(2016) |  |
| Evangeline | Kraemer *et al.*(2016) |  |
| Franklin | Kraemer *et al.*(2016) |  |
| Grant | Kraemer *et al.*(2016) |  |
| Iberia | Kraemer *et al.*(2016) | Hahn *et al.*(2016) |
| Iberville | Kraemer *et al.*(2016) |  |
| Jackson | Kraemer *et al.*(2016) |  |
| Jefferson | Kraemer *et al.*(2016) | Kraemer *et al.*(2016) |
| Jefferson Davis | Kraemer *et al.*(2016) |  |
| La Salle | Kraemer *et al.*(2016) |  |
| Lafayette | Kraemer *et al.*(2016) | Kraemer *et al.*(2016) |
| LaFourche | Kraemer *et al.*(2016) |  |
| Lincoln | Kraemer *et al.*(2016) | Hahn *et al.*(2016) |
| Livingston | Kraemer *et al.*(2016) |  |
| Natchitoches | Kraemer *et al.*(2016) |  |
| Orleans | Hahn *et al.*(2017) | Hahn *et al.*(2017) |
| Ouachita | Kraemer *et al.*(2016) | Kraemer *et al.*(2016) |
| Plaquemines | Kraemer *et al.*(2016) |  |
| Pointe Coupee | Kraemer *et al.*(2016) |  |
| Rapides | Kraemer *et al.*(2016) | Kraemer *et al.*(2016) |
| Red River | Kraemer *et al.*(2016) |  |
| Richland | Kraemer *et al.*(2016) |  |
| St. Charles | Kraemer *et al.*(2016) |  |
| St. Helena | Kraemer *et al.*(2016) |  |
| St. James | Kraemer *et al.*(2016) |  |
| St. John the Baptist | Kraemer *et al.*(2016) |  |
| St. Landry | Kraemer *et al.*(2016) |  |
| St. Martin | Kraemer *et al.*(2016) |  |
| St. Mary | Kraemer *et al.*(2016) | Hahn *et al.*(2016) |
| St. Tammany | Kraemer *et al.*(2016) | Kraemer *et al.*(2016) |
| Tangipahoa | Kraemer *et al.*(2016) | Hahn *et al.*(2016) |
| Tensas | Kraemer *et al.*(2016) |  |
| Terrebonne | Kraemer *et al.*(2016) |  |
| Union | Kraemer *et al.*(2016) |  |
| Vermilion | Kraemer *et al.*(2016) | Kraemer *et al.*(2016) |
| Vernon | Kraemer *et al.*(2016) |  |
| Washington | Kraemer *et al.*(2016) |  |
| Webster | Kraemer *et al.*(2016) |  |
| West Baton Rouge | Kraemer *et al.*(2016) |  |
| West Feliciana | Kraemer *et al.*(2016) |  |
| Winn | Kraemer *et al.*(2016) |  |
| Maryland |  |  |
| Allegany | Kraemer *et al.*(2016) |  |
| Anne Arundel | Hahn *et al.*(2016) | Kraemer *et al.*(2016) |
| Baltimore | Hahn *et al.*(2016) | Hahn *et al.*(2016) |
| Baltimore City | Kraemer *et al.*(2016) |  |
| Calvert | Hahn *et al.*(2016) | Hahn *et al.*(2016) |
| Caroline | Kraemer *et al.*(2016) |  |
| Carroll | Kraemer *et al.*(2016) |  |
| Cecil | Kraemer *et al.*(2016) | ArboNET |
| Charles | Kraemer *et al.*(2016) |  |
| Dorchester | Kraemer *et al.*(2016) |  |
| Frederick | Kraemer *et al.*(2016) |  |
| Harford | Kraemer *et al.*(2016) | VectorMap |
| Howard | ArboNET | Hahn *et al.*(2016) |
| Kent | Kraemer *et al.*(2016) |  |
| Montgomery | Kraemer *et al.*(2016) | Hahn *et al.*(2016) |
| Prince Georges | Kraemer *et al.*(2016) | ArboNET |
| Queen Annes | Kraemer *et al.*(2016) | ArboNET |
| Somerset | Hahn *et al.*(2016) |  |
| St. Marys | ArboNET |  |
| Talbot | Kraemer *et al.*(2016) |  |
| Washington | Kraemer *et al.*(2016) |  |
| Wicomico | Hahn *et al.*(2016) | ArboNET |
| Worcester | Hahn *et al.*(2016) | ArboNET |
| Massachusetts |  |  |
| Bristol | Hahn *et al.*(2016) |  |
| Essex | Hahn *et al.*(2016) |  |
| Middlesex | Hahn *et al.*(2016) |  |
| Plymouth | Hahn *et al.*(2017) |  |
| Suffolk | Hahn *et al.*(2016) |  |
| Worcester | ArboNET |  |
| Michigan |  |  |
| Livingston |  | ArboNET |
| Oakland |  | ArboNET |
| Ottawa | ArboNET |  |
| Minnesota |  |  |
| Carver | Hahn *et al.*(2016) |  |
| Dakota | ArboNET |  |
| Scott | Hahn *et al.*(2016) |  |
| Mississippi |  |  |
| Adams | Hahn *et al.*(2017) |  |
| Alcorn | Kraemer *et al.*(2016) |  |
| Amite | Hahn *et al.*(2017) |  |
| Attala | Hahn *et al.*(2017) |  |
| Benton | Hahn *et al.*(2017) |  |
| Bolivar | Hahn *et al.*(2017) |  |
| Calhoun | Hahn *et al.*(2017) |  |
| Carroll | Kraemer *et al.*(2016) |  |
| Chickasaw | Kraemer *et al.*(2016) |  |
| Choctaw | Hahn *et al.*(2017) |  |
| Claiborne | Hahn *et al.*(2017) |  |
| Clarke | Kraemer *et al.*(2016) |  |
| Clay | Hahn *et al.*(2017) |  |
| Coahoma | Hahn *et al.*(2017) |  |
| Copiah | Hahn *et al.*(2017) |  |
| Covington | Hahn *et al.*(2017) |  |
| De Soto | Kraemer *et al.*(2016) |  |
| Forrest | Kraemer *et al.*(2016) |  |
| Franklin | Hahn *et al.*(2017) |  |
| George | Hahn *et al.*(2017) |  |
| Greene | Hahn *et al.*(2017) |  |
| Grenada | Hahn *et al.*(2017) |  |
| Hancock | Kraemer *et al.*(2016) | Hahn *et al.*(2017) |
| Harrison | Kraemer *et al.*(2016) |  |
| Hinds | Kraemer *et al.*(2016) | Hahn *et al.*(2017) |
| Holmes | Hahn *et al.*(2017) |  |
| Humphreys | Hahn *et al.*(2017) |  |
| Issaquena | Hahn *et al.*(2017) |  |
| Itawamba | Hahn *et al.*(2017) |  |
| Jackson | Kraemer *et al.*(2016) |  |
| Jasper | Kraemer *et al.*(2016) |  |
| Jefferson | Hahn *et al.*(2017) |  |
| Jefferson Davis | Hahn *et al.*(2017) |  |
| Jones | Kraemer *et al.*(2016) |  |
| Kemper | Hahn *et al.*(2017) |  |
| Lafayette | Hahn *et al.*(2017) |  |
| Lamar | Kraemer *et al.*(2016) |  |
| Lauderdale | Hahn *et al.*(2017) | Kraemer *et al.*(2016) |
| Lawrence | Hahn *et al.*(2017) |  |
| Leake | Hahn *et al.*(2017) |  |
| Lee | Hahn *et al.*(2017) |  |
| Leflore | ArboNET |  |
| Lincoln | Hahn *et al.*(2017) |  |
| Lowndes | Kraemer *et al.*(2016) | Hahn *et al.*(2017) |
| Madison | Hahn *et al.*(2017) |  |
| Marion | Hahn *et al.*(2017) | ArboNET |
| Marshall | Hahn *et al.*(2017) |  |
| Monroe | Kraemer *et al.*(2016) |  |
| Montgomery | Hahn *et al.*(2017) |  |
| Neshoba | Hahn *et al.*(2017) |  |
| Newton | Hahn *et al.*(2017) | Kraemer *et al.*(2016) |
| Noxubee | Hahn *et al.*(2017) |  |
| Oktibbeha | Kraemer *et al.*(2016) | Hahn *et al.*(2017) |
| Panola | Hahn *et al.*(2017) |  |
| Pearl River | Hahn *et al.*(2017) |  |
| Perry | Hahn *et al.*(2017) |  |
| Pike | Hahn *et al.*(2017) |  |
| Pontotoc | Kraemer *et al.*(2016) |  |
| Prentiss | Kraemer *et al.*(2016) |  |
| Quitman | Hahn *et al.*(2017) |  |
| Rankin | Kraemer *et al.*(2016) |  |
| Scott | Hahn *et al.*(2017) |  |
| Sharkey | Hahn *et al.*(2017) |  |
| Simpson | Hahn *et al.*(2017) |  |
| Smith | Hahn *et al.*(2017) |  |
| Stone | Hahn *et al.*(2017) |  |
| Sunflower | Hahn *et al.*(2017) |  |
| Tallahatchie | Hahn *et al.*(2017) |  |
| Tate | Hahn *et al.*(2017) |  |
| Tippah | Hahn *et al.*(2017) |  |
| Tishomingo | Kraemer *et al.*(2016) |  |
| Tunica | Kraemer *et al.*(2016) |  |
| Union | Hahn *et al.*(2017) |  |
| Walthall | Hahn *et al.*(2017) |  |
| Warren | Kraemer *et al.*(2016) | Kraemer *et al.*(2016) |
| Washington | Kraemer *et al.*(2016) |  |
| Wayne | Kraemer *et al.*(2016) |  |
| Webster | Hahn *et al.*(2017) |  |
| Wilkinson | Hahn *et al.*(2017) |  |
| Winston | Kraemer *et al.*(2016) |  |
| Yalobusha | Hahn *et al.*(2017) |  |
| Yazoo | Hahn *et al.*(2017) |  |
| Missouri |  |  |
| Audrain | Hahn *et al.*(2016) |  |
| Bollinger | ArboNET |  |
| Boone | ArboNET |  |
| Buchanan | Kraemer *et al.*(2016) |  |
| Butler | Kraemer *et al.*(2016) |  |
| Callaway | Hahn *et al.*(2016) |  |
| Cape Girardeau | Kraemer *et al.*(2016) |  |
| Clark | ArboNET |  |
| Clay | Kraemer *et al.*(2016) |  |
| Cole | Kraemer *et al.*(2016) |  |
| Greene | Kraemer *et al.*(2016) |  |
| Jackson | Kraemer *et al.*(2016) |  |
| Jasper | Kraemer *et al.*(2016) |  |
| Jefferson | Kraemer *et al.*(2016) |  |
| Lewis | ArboNET |  |
| Miller | ArboNET |  |
| Mississippi | Kraemer *et al.*(2016) |  |
| Perry | Kraemer *et al.*(2016) |  |
| Pulaski | VectorMap |  |
| Ralls | ArboNET |  |
| Scott | Kraemer *et al.*(2016) |  |
| St. Charles | Kraemer *et al.*(2016) |  |
| St. Clair | ArboNET |  |
| St. Francois | Kraemer *et al.*(2016) |  |
| St. Louis | Kraemer *et al.*(2016) |  |
| St. Louis City | ArboNET |  |
| Ste. Genevieve | Kraemer *et al.*(2016) |  |
| Stone | Kraemer *et al.*(2016) |  |
| Taney | ArboNET |  |
| Washington | Kraemer *et al.*(2016) |  |
| Wayne | Kraemer *et al.*(2016) |  |
| Nebraska |  |  |
| Cuming | Kraemer *et al.*(2016) |  |
| Douglas | Kraemer *et al.*(2016) |  |
| Lancaster | Kraemer *et al.*(2016) |  |
| Richardson | Hahn *et al.*(2016) |  |
| New Hampshire |  |  |
| Grafton | ArboNET |  |
| Hillsborough | ArboNET | ArboNET |
| Rockingham | ArboNET |  |
| Sullivan | ArboNET |  |
| New Jersey |  |  |
| Atlantic | Kraemer *et al.*(2016) |  |
| Bergen | Hahn *et al.*(2016) |  |
| Burlington | Kraemer *et al.*(2016) | VectorMap |
| Camden | Kraemer *et al.*(2016) |  |
| Cape May | Hahn *et al.*(2016) |  |
| Cumberland | Kraemer *et al.*(2016) |  |
| Essex | Kraemer *et al.*(2016) |  |
| Gloucester | Kraemer *et al.*(2016) | Hahn *et al.*(2016) |
| Hudson | Kraemer *et al.*(2016) |  |
| Hunterdon | Hahn *et al.*(2016) |  |
| Mercer | ArboNET |  |
| Middlesex | Kraemer *et al.*(2016) |  |
| Monmouth | Kraemer *et al.*(2016) |  |
| Morris | Hahn *et al.*(2016) | Kraemer *et al.*(2016) |
| Ocean | Kraemer *et al.*(2016) |  |
| Passaic | Hahn *et al.*(2016) |  |
| Salem | Kraemer *et al.*(2016) |  |
| Somerset | ArboNET | ArboNET |
| Sussex | Hahn *et al.*(2016) |  |
| Union | Kraemer *et al.*(2016) |  |
| Warren | Hahn *et al.*(2016) |  |
| New Mexico |  |  |
| Chaves | Hahn *et al.*(2016) |  |
| Dona Ana |  | ArboNET |
| Eddy | Hahn *et al.*(2016) | Kraemer *et al.*(2016) |
| Otero |  | VectorMap |
| New York |  |  |
| Bronx | Kraemer *et al.*(2016) |  |
| Kings | Hahn *et al.*(2017) |  |
| Madison | Hahn *et al.*(2016) |  |
| Nassau | Hahn *et al.*(2016) |  |
| New York | Hahn *et al.*(2017) |  |
| Oneida | ArboNET |  |
| Orange | Kraemer *et al.*(2016) |  |
| Putnam | Hahn *et al.*(2016) |  |
| Queens | Kraemer *et al.*(2016) |  |
| Richmond | Hahn *et al.*(2017) |  |
| Rockland | Hahn *et al.*(2016) |  |
| Seneca | Hahn *et al.*(2016) |  |
| Suffolk | Hahn *et al.*(2016) |  |
| Westchester | ArboNET | Kraemer *et al.*(2016) |
| North Carolina |  |  |
| Alamance | Kraemer *et al.*(2016) |  |
| Alexander | Kraemer *et al.*(2016) |  |
| Alleghany | Kraemer *et al.*(2016) |  |
| Anson | Kraemer *et al.*(2016) |  |
| Ashe | Kraemer *et al.*(2016) |  |
| Avery | Kraemer *et al.*(2016) |  |
| Beaufort | Kraemer *et al.*(2016) |  |
| Bertie | Kraemer *et al.*(2016) |  |
| Bladen | Kraemer *et al.*(2016) |  |
| Brunswick | Kraemer *et al.*(2016) |  |
| Buncombe | Kraemer *et al.*(2016) |  |
| Burke | Kraemer *et al.*(2016) |  |
| Cabarrus | Kraemer *et al.*(2016) |  |
| Caldwell | Kraemer *et al.*(2016) |  |
| Camden | Kraemer *et al.*(2016) |  |
| Carteret | Kraemer *et al.*(2016) |  |
| Caswell | Kraemer *et al.*(2016) |  |
| Catawba | Kraemer *et al.*(2016) |  |
| Chatham | Kraemer *et al.*(2016) | ArboNET |
| Cherokee | Kraemer *et al.*(2016) |  |
| Chowan | Kraemer *et al.*(2016) |  |
| Clay | Kraemer *et al.*(2016) |  |
| Cleveland | Kraemer *et al.*(2016) |  |
| Columbus | Kraemer *et al.*(2016) |  |
| Craven | Kraemer *et al.*(2016) |  |
| Cumberland | Kraemer *et al.*(2016) |  |
| Currituck | Kraemer *et al.*(2016) |  |
| Dare | Kraemer *et al.*(2016) |  |
| Davidson | Kraemer *et al.*(2016) |  |
| Davie | Kraemer *et al.*(2016) |  |
| Duplin | Kraemer *et al.*(2016) |  |
| Durham | Kraemer *et al.*(2016) |  |
| Edgecombe | Kraemer *et al.*(2016) |  |
| Forsyth | Kraemer *et al.*(2016) |  |
| Franklin | Kraemer *et al.*(2016) |  |
| Gaston | Kraemer *et al.*(2016) |  |
| Gates | Kraemer *et al.*(2016) |  |
| Graham | Kraemer *et al.*(2016) |  |
| Granville | Kraemer *et al.*(2016) |  |
| Greene | Kraemer *et al.*(2016) |  |
| Guilford | Kraemer *et al.*(2016) |  |
| Halifax | Kraemer *et al.*(2016) |  |
| Harnett | Kraemer *et al.*(2016) |  |
| Haywood | Kraemer *et al.*(2016) |  |
| Henderson | Kraemer *et al.*(2016) |  |
| Hertford | Kraemer *et al.*(2016) |  |
| Hoke | VectorMap | VectorMap |
| Hyde | Kraemer *et al.*(2016) |  |
| Iredell | Kraemer *et al.*(2016) |  |
| Jackson | Kraemer *et al.*(2016) |  |
| Johnston | Kraemer *et al.*(2016) |  |
| Jones | Kraemer *et al.*(2016) |  |
| Lee | Kraemer *et al.*(2016) |  |
| Lenoir | Kraemer *et al.*(2016) |  |
| Lincoln | Kraemer *et al.*(2016) |  |
| Macon | Kraemer *et al.*(2016) |  |
| Madison | Kraemer *et al.*(2016) |  |
| Martin | Kraemer *et al.*(2016) |  |
| McDowell | Kraemer *et al.*(2016) |  |
| Mecklenburg | Kraemer *et al.*(2016) |  |
| Mitchell | Kraemer *et al.*(2016) |  |
| Montgomery | Kraemer *et al.*(2016) |  |
| Moore | Kraemer *et al.*(2016) |  |
| Nash | Kraemer *et al.*(2016) |  |
| New Hanover | Kraemer *et al.*(2016) |  |
| Northampton | Kraemer *et al.*(2016) |  |
| Onslow | Kraemer *et al.*(2016) |  |
| Orange | Kraemer *et al.*(2016) |  |
| Pamlico | Kraemer *et al.*(2016) |  |
| Pasquotank | Kraemer *et al.*(2016) |  |
| Pender | Kraemer *et al.*(2016) |  |
| Perquimans | Kraemer *et al.*(2016) |  |
| Person | Kraemer *et al.*(2016) |  |
| Pitt | Kraemer *et al.*(2016) |  |
| Polk | Kraemer *et al.*(2016) |  |
| Randolph | Kraemer *et al.*(2016) |  |
| Richmond | Kraemer *et al.*(2016) |  |
| Robeson | Kraemer *et al.*(2016) |  |
| Rockingham | Kraemer *et al.*(2016) |  |
| Rowan | Kraemer *et al.*(2016) |  |
| Rutherford | Kraemer *et al.*(2016) |  |
| Sampson | Kraemer *et al.*(2016) |  |
| Scotland | Kraemer *et al.*(2016) | ArboNET |
| Stanly | Kraemer *et al.*(2016) |  |
| Stokes | Kraemer *et al.*(2016) |  |
| Surry | Kraemer *et al.*(2016) |  |
| Swain | Kraemer *et al.*(2016) | Hahn *et al.*(2016) |
| Transylvania | Kraemer *et al.*(2016) |  |
| Tyrrell | Kraemer *et al.*(2016) |  |
| Union | Kraemer *et al.*(2016) |  |
| Vance | Kraemer *et al.*(2016) |  |
| Wake | Kraemer *et al.*(2016) | Kraemer *et al.*(2016) |
| Warren | Kraemer *et al.*(2016) |  |
| Washington | Kraemer *et al.*(2016) |  |
| Watauga | Kraemer *et al.*(2016) |  |
| Wayne | Kraemer *et al.*(2016) | Kraemer *et al.*(2016) |
| Wilkes | Kraemer *et al.*(2016) |  |
| Wilson | Kraemer *et al.*(2016) |  |
| Yadkin | Kraemer *et al.*(2016) |  |
| Yancey | Kraemer *et al.*(2016) |  |
| Ohio |  |  |
| Athens | Kraemer *et al.*(2016) |  |
| Butler | ArboNET | Hahn *et al.*(2016) |
| Clermont | Kraemer *et al.*(2016) |  |
| Columbiana | Kraemer *et al.*(2016) |  |
| Cuyahoga | Kraemer *et al.*(2016) |  |
| Darke | Kraemer *et al.*(2016) |  |
| Franklin | Kraemer *et al.*(2016) |  |
| Greene | Hahn *et al.*(2016) |  |
| Hamilton | Kraemer *et al.*(2016) | Hahn *et al.*(2016) |
| Harrison | Kraemer *et al.*(2016) |  |
| Huron | ArboNET |  |
| Jackson | Kraemer *et al.*(2016) |  |
| Knox | Kraemer *et al.*(2016) |  |
| Lake | Kraemer *et al.*(2016) |  |
| Lawrence | Kraemer *et al.*(2016) |  |
| Lorain | Kraemer *et al.*(2016) |  |
| Lucas | Hahn *et al.*(2016) |  |
| Mahoning | Kraemer *et al.*(2016) |  |
| Montgomery | Kraemer *et al.*(2016) |  |
| Scioto | Kraemer *et al.*(2016) |  |
| Summit | Kraemer *et al.*(2016) |  |
| Warren | Kraemer *et al.*(2016) |  |
| Washington | ArboNET |  |
| Wayne | Hahn *et al.*(2016) |  |
| Oklahoma |  |  |
| Adair | Kraemer *et al.*(2016) |  |
| Alfalfa | Hahn *et al.*(2016) |  |
| Atoka | Hahn *et al.*(2016) |  |
| Beckham | Hahn *et al.*(2016) |  |
| Blaine | Hahn *et al.*(2016) |  |
| Bryan | Kraemer *et al.*(2016) |  |
| Caddo | Kraemer *et al.*(2016) |  |
| Canadian | Hahn *et al.*(2016) |  |
| Carter | Kraemer *et al.*(2016) |  |
| Cherokee | Kraemer *et al.*(2016) |  |
| Choctaw | Kraemer *et al.*(2016) |  |
| Cleveland | Kraemer *et al.*(2016) |  |
| Coal | Hahn *et al.*(2016) |  |
| Comanche | Kraemer *et al.*(2016) | ArboNET |
| Craig | Kraemer *et al.*(2016) |  |
| Creek | Kraemer *et al.*(2016) |  |
| Custer | Hahn *et al.*(2016) |  |
| Delaware | Kraemer *et al.*(2016) |  |
| Dewey | Hahn *et al.*(2016) |  |
| Ellis | Hahn *et al.*(2016) |  |
| Garfield | Kraemer *et al.*(2016) |  |
| Garvin | Hahn *et al.*(2016) |  |
| Grady | Kraemer *et al.*(2016) |  |
| Grant | Hahn *et al.*(2016) |  |
| Greer | Kraemer *et al.*(2016) |  |
| Harper | Hahn *et al.*(2016) |  |
| Haskell | Hahn *et al.*(2016) |  |
| Hughes | Kraemer *et al.*(2016) |  |
| Johnston | Hahn *et al.*(2016) |  |
| Kay | Hahn *et al.*(2016) |  |
| Kingfisher | Hahn *et al.*(2016) |  |
| Kiowa | Kraemer *et al.*(2016) |  |
| Latimer | Hahn *et al.*(2016) |  |
| Le Flore | Hahn *et al.*(2016) |  |
| Lincoln | Kraemer *et al.*(2016) |  |
| Logan | Kraemer *et al.*(2016) |  |
| Love | Kraemer *et al.*(2016) |  |
| Major | Hahn *et al.*(2016) |  |
| Marshall | Kraemer *et al.*(2016) |  |
| Mayes | Kraemer *et al.*(2016) |  |
| McClain | Kraemer *et al.*(2016) |  |
| McCurtain | Kraemer *et al.*(2016) |  |
| McIntosh | Kraemer *et al.*(2016) |  |
| Murray | Kraemer *et al.*(2016) |  |
| Muskogee | Kraemer *et al.*(2016) |  |
| Noble | Kraemer *et al.*(2016) |  |
| Nowata | Kraemer *et al.*(2016) |  |
| Okfuskee | Kraemer *et al.*(2016) |  |
| Oklahoma | Kraemer *et al.*(2016) | Kraemer *et al.*(2016) |
| Okmulgee | Kraemer *et al.*(2016) |  |
| Osage | Kraemer *et al.*(2016) |  |
| Ottawa | Kraemer *et al.*(2016) |  |
| Pawnee | Kraemer *et al.*(2016) |  |
| Payne | Kraemer *et al.*(2016) |  |
| Pittsburg | Kraemer *et al.*(2016) |  |
| Pontotoc | Hahn *et al.*(2016) |  |
| Pottawatomie | Kraemer *et al.*(2016) |  |
| Pushmataha | Hahn *et al.*(2016) |  |
| Roger Mills | Hahn *et al.*(2016) |  |
| Rogers | Kraemer *et al.*(2016) |  |
| Seminole | Kraemer *et al.*(2016) |  |
| Sequoyah | Kraemer *et al.*(2016) |  |
| Texas | Hahn *et al.*(2016) |  |
| Tulsa | Kraemer *et al.*(2016) |  |
| Wagoner | Kraemer *et al.*(2016) |  |
| Washington | Kraemer *et al.*(2016) |  |
| Washita | Hahn *et al.*(2016) |  |
| Woods | Hahn *et al.*(2016) |  |
| Woodward | Hahn *et al.*(2016) |  |
| Oregon |  |  |
| Multnomah | Hahn *et al.*(2016) |  |
| Pennsylvania |  |  |
| Adams | Hahn *et al.*(2016) |  |
| Allegheny | Hahn *et al.*(2016) |  |
| Armstrong | Hahn *et al.*(2016) |  |
| Beaver | Hahn *et al.*(2016) |  |
| Berks | Hahn *et al.*(2016) |  |
| Blair | Hahn *et al.*(2016) |  |
| Bucks | ArboNET | Hahn *et al.*(2016) |
| Butler | Hahn *et al.*(2016) |  |
| Cambria | Hahn *et al.*(2016) |  |
| Carbon | Hahn *et al.*(2016) |  |
| Chester | Hahn *et al.*(2016) |  |
| Clearfield | Hahn *et al.*(2016) |  |
| Columbia | Hahn *et al.*(2016) |  |
| Crawford | Hahn *et al.*(2016) |  |
| Cumberland | Kraemer *et al.*(2016) |  |
| Dauphin | Hahn *et al.*(2016) |  |
| Delaware | Hahn *et al.*(2016) |  |
| Erie | Hahn *et al.*(2016) |  |
| Fayette | Hahn *et al.*(2016) |  |
| Franklin | Kraemer *et al.*(2016) |  |
| Greene | Hahn *et al.*(2016) |  |
| Juniata | Hahn *et al.*(2016) |  |
| Lackawanna | Hahn *et al.*(2016) |  |
| Lancaster | Hahn *et al.*(2016) |  |
| Lebanon | Hahn *et al.*(2016) |  |
| Lehigh | Hahn *et al.*(2016) |  |
| Luzerne | Hahn *et al.*(2016) |  |
| Monroe | Hahn *et al.*(2016) |  |
| Montgomery | Hahn *et al.*(2016) |  |
| Northampton | Hahn *et al.*(2016) |  |
| Northumberland | Hahn *et al.*(2016) |  |
| Perry | Hahn *et al.*(2016) |  |
| Philadelphia | Hahn *et al.*(2016) |  |
| Snyder | Hahn *et al.*(2016) |  |
| Somerset | Hahn *et al.*(2016) |  |
| Venango | Hahn *et al.*(2016) |  |
| Washington | Hahn *et al.*(2016) |  |
| Westmoreland | Hahn *et al.*(2016) |  |
| York | Kraemer *et al.*(2016) |  |
| Rhode Island |  |  |
| Bristol | ArboNET |  |
| Kent | Hahn *et al.*(2016) |  |
| Newport |  | Kraemer *et al.*(2016) |
| Providence | Hahn *et al.*(2016) |  |
| South Carolina |  |  |
| Abbeville | Kraemer *et al.*(2016) |  |
| Aiken | Kraemer *et al.*(2016) |  |
| Allendale | Kraemer *et al.*(2016) |  |
| Anderson | Kraemer *et al.*(2016) |  |
| Bamberg | Kraemer *et al.*(2016) |  |
| Barnwell | Kraemer *et al.*(2016) |  |
| Beaufort | Kraemer *et al.*(2016) |  |
| Berkeley | Kraemer *et al.*(2016) |  |
| Calhoun | Kraemer *et al.*(2016) |  |
| Charleston | Kraemer *et al.*(2016) | Kraemer *et al.*(2016) |
| Cherokee | Kraemer *et al.*(2016) |  |
| Chester | Kraemer *et al.*(2016) |  |
| Chesterfield | Kraemer *et al.*(2016) |  |
| Clarendon | Kraemer *et al.*(2016) |  |
| Colleton | Kraemer *et al.*(2016) |  |
| Darlington | Kraemer *et al.*(2016) |  |
| Dillon | Kraemer *et al.*(2016) |  |
| Dorchester | Kraemer *et al.*(2016) | ArboNET |
| Edgefield | Kraemer *et al.*(2016) |  |
| Fairfield | Kraemer *et al.*(2016) |  |
| Florence | Kraemer *et al.*(2016) | Kraemer *et al.*(2016) |
| Georgetown | Kraemer *et al.*(2016) |  |
| Greenville | Kraemer *et al.*(2016) | Kraemer *et al.*(2016) |
| Greenwood | Kraemer *et al.*(2016) |  |
| Hampton | Kraemer *et al.*(2016) |  |
| Horry | Kraemer *et al.*(2016) |  |
| Jasper | Kraemer *et al.*(2016) |  |
| Kershaw | Kraemer *et al.*(2016) |  |
| Lancaster | Kraemer *et al.*(2016) |  |
| Laurens | Kraemer *et al.*(2016) | Kraemer *et al.*(2016) |
| Lee | Kraemer *et al.*(2016) |  |
| Lexington | Kraemer *et al.*(2016) |  |
| Marion | Kraemer *et al.*(2016) |  |
| Marlboro | Kraemer *et al.*(2016) |  |
| McCormick | Kraemer *et al.*(2016) |  |
| Newberry | Kraemer *et al.*(2016) |  |
| Oconee | Kraemer *et al.*(2016) |  |
| Orangeburg | Kraemer *et al.*(2016) |  |
| Pickens | Kraemer *et al.*(2016) | Hahn *et al.*(2016) |
| Richland | Kraemer *et al.*(2016) | Kraemer *et al.*(2016) |
| Saluda | Kraemer *et al.*(2016) |  |
| Spartanburg | Kraemer *et al.*(2016) | Kraemer *et al.*(2016) |
| Sumter | Kraemer *et al.*(2016) | Kraemer *et al.*(2016) |
| Union | Kraemer *et al.*(2016) |  |
| Williamsburg | Kraemer *et al.*(2016) |  |
| York | Kraemer *et al.*(2016) |  |
| Tennessee |  |  |
| Anderson | Kraemer *et al.*(2016) |  |
| Bedford | Kraemer *et al.*(2016) |  |
| Benton | Kraemer *et al.*(2016) |  |
| Bledsoe | Kraemer *et al.*(2016) |  |
| Blount | Kraemer *et al.*(2016) |  |
| Bradley | Kraemer *et al.*(2016) |  |
| Campbell | Kraemer *et al.*(2016) |  |
| Cannon | Kraemer *et al.*(2016) |  |
| Carroll | Kraemer *et al.*(2016) |  |
| Carter | Kraemer *et al.*(2016) |  |
| Cheatham | Kraemer *et al.*(2016) |  |
| Chester | Kraemer *et al.*(2016) |  |
| Claiborne | Kraemer *et al.*(2016) |  |
| Clay | Kraemer *et al.*(2016) |  |
| Cocke | Kraemer *et al.*(2016) |  |
| Coffee | Kraemer *et al.*(2016) |  |
| Crockett | Kraemer *et al.*(2016) |  |
| Cumberland | Kraemer *et al.*(2016) |  |
| Davidson | Kraemer *et al.*(2016) | ArboNET |
| De Kalb | Kraemer *et al.*(2016) |  |
| Decatur | Kraemer *et al.*(2016) |  |
| Dickson | Kraemer *et al.*(2016) |  |
| Dyer | Kraemer *et al.*(2016) |  |
| Fayette | Kraemer *et al.*(2016) |  |
| Fentress | Kraemer *et al.*(2016) |  |
| Franklin | Kraemer *et al.*(2016) |  |
| Gibson | Kraemer *et al.*(2016) |  |
| Giles | Kraemer *et al.*(2016) |  |
| Grainger | Kraemer *et al.*(2016) |  |
| Greene | Kraemer *et al.*(2016) |  |
| Grundy | Kraemer *et al.*(2016) |  |
| Hamblen | Kraemer *et al.*(2016) |  |
| Hamilton | Kraemer *et al.*(2016) | ArboNET |
| Hancock | Kraemer *et al.*(2016) |  |
| Hardeman | Kraemer *et al.*(2016) |  |
| Hardin | Kraemer *et al.*(2016) |  |
| Hawkins | Kraemer *et al.*(2016) |  |
| Haywood | Kraemer *et al.*(2016) |  |
| Henderson | Kraemer *et al.*(2016) |  |
| Henry | Kraemer *et al.*(2016) |  |
| Hickman | Kraemer *et al.*(2016) |  |
| Houston | Kraemer *et al.*(2016) |  |
| Humphreys | Kraemer *et al.*(2016) |  |
| Jackson | Kraemer *et al.*(2016) |  |
| Jefferson | Kraemer *et al.*(2016) |  |
| Johnson | Kraemer *et al.*(2016) |  |
| Knox | Kraemer *et al.*(2016) | ArboNET |
| Lake | Kraemer *et al.*(2016) |  |
| Lauderdale | Kraemer *et al.*(2016) |  |
| Lawrence | Kraemer *et al.*(2016) |  |
| Lewis | Kraemer *et al.*(2016) |  |
| Lincoln | Kraemer *et al.*(2016) |  |
| Loudon | Kraemer *et al.*(2016) |  |
| Macon | Kraemer *et al.*(2016) |  |
| Madison | Kraemer *et al.*(2016) |  |
| Marion | Kraemer *et al.*(2016) |  |
| Marshall | Kraemer *et al.*(2016) |  |
| Maury | Kraemer *et al.*(2016) |  |
| McMinn | Kraemer *et al.*(2016) |  |
| McNairy | Kraemer *et al.*(2016) |  |
| Meigs | Kraemer *et al.*(2016) |  |
| Monroe | Kraemer *et al.*(2016) |  |
| Montgomery | Kraemer *et al.*(2016) |  |
| Moore | Kraemer *et al.*(2016) |  |
| Morgan | Kraemer *et al.*(2016) |  |
| Obion | Kraemer *et al.*(2016) |  |
| Overton | Kraemer *et al.*(2016) |  |
| Perry | Kraemer *et al.*(2016) |  |
| Pickett | Kraemer *et al.*(2016) |  |
| Polk | Kraemer *et al.*(2016) |  |
| Putnam | Kraemer *et al.*(2016) |  |
| Rhea | Kraemer *et al.*(2016) |  |
| Roane | Kraemer *et al.*(2016) |  |
| Robertson | Kraemer *et al.*(2016) |  |
| Rutherford | Kraemer *et al.*(2016) |  |
| Scott | Kraemer *et al.*(2016) |  |
| Sequatchie | Kraemer *et al.*(2016) |  |
| Sevier | Kraemer *et al.*(2016) |  |
| Shelby | Hahn *et al.*(2017) | Hahn *et al.*(2017) |
| Smith | Kraemer *et al.*(2016) |  |
| Stewart | Kraemer *et al.*(2016) |  |
| Sullivan | Kraemer *et al.*(2016) |  |
| Sumner | Kraemer *et al.*(2016) |  |
| Tipton | Kraemer *et al.*(2016) |  |
| Trousdale | Kraemer *et al.*(2016) |  |
| Unicoi | Kraemer *et al.*(2016) |  |
| Union | Kraemer *et al.*(2016) |  |
| Van Buren | Kraemer *et al.*(2016) |  |
| Warren | Kraemer *et al.*(2016) |  |
| Washington | Kraemer *et al.*(2016) |  |
| Wayne | Kraemer *et al.*(2016) |  |
| Weakley | Kraemer *et al.*(2016) |  |
| White | Kraemer *et al.*(2016) |  |
| Williamson | Kraemer *et al.*(2016) |  |
| Wilson | Kraemer *et al.*(2016) |  |
| Texas |  |  |
| Anderson | Kraemer *et al.*(2016) | Kraemer *et al.*(2016) |
| Angelina | Kraemer *et al.*(2016) | Kraemer *et al.*(2016) |
| Aransas | Hahn *et al.*(2016) | Hahn *et al.*(2016) |
| Atascosa | Kraemer *et al.*(2016) |  |
| Austin | Kraemer *et al.*(2016) | Kraemer *et al.*(2016) |
| Bailey | Hahn *et al.*(2017) |  |
| Bandera | Kraemer *et al.*(2016) | Hahn *et al.*(2017) |
| Bastrop | Kraemer *et al.*(2016) |  |
| Baylor |  | Hahn *et al.*(2017) |
| Bee | Kraemer *et al.*(2016) | Kraemer *et al.*(2016) |
| Bell | Kraemer *et al.*(2016) | Kraemer *et al.*(2016) |
| Bexar | Kraemer *et al.*(2016) | Kraemer *et al.*(2016) |
| Blanco | Kraemer *et al.*(2016) |  |
| Borden | Hahn *et al.*(2017) | Hahn *et al.*(2017) |
| Bowie | Kraemer *et al.*(2016) | Hahn *et al.*(2017) |
| Brazoria | Kraemer *et al.*(2016) | Hahn *et al.*(2016) |
| Brazos | ArboNET | Kraemer *et al.*(2016) |
| Brewster |  | Hahn *et al.*(2017) |
| Briscoe | Hahn *et al.*(2017) |  |
| Brooks | Kraemer *et al.*(2016) | Kraemer *et al.*(2016) |
| Burleson | Hahn *et al.*(2016) |  |
| Caldwell | Kraemer *et al.*(2016) |  |
| Cameron | Kraemer *et al.*(2016) | Kraemer *et al.*(2016) |
| Chambers | Kraemer *et al.*(2016) | ArboNET |
| Cherokee | Kraemer *et al.*(2016) | Kraemer *et al.*(2016) |
| Childress |  | Hahn *et al.*(2017) |
| Cochran | Hahn *et al.*(2017) |  |
| Collin | Hahn *et al.*(2016) | Kraemer *et al.*(2016) |
| Colorado | Kraemer *et al.*(2016) |  |
| Comal | Kraemer *et al.*(2016) | Kraemer *et al.*(2016) |
| Comanche | Hahn *et al.*(2016) |  |
| Concho | Kraemer *et al.*(2016) |  |
| Cooke | Hahn *et al.*(2016) | Hahn *et al.*(2016) |
| Coryell | Kraemer *et al.*(2016) |  |
| Cottle |  | Hahn *et al.*(2017) |
| Dallas | Kraemer *et al.*(2016) | Hahn *et al.*(2016) |
| De Witt | Kraemer *et al.*(2016) |  |
| Denton | Hahn *et al.*(2016) | Kraemer *et al.*(2016) |
| Dickens |  | Hahn *et al.*(2017) |
| Dimmit | Kraemer *et al.*(2016) | Kraemer *et al.*(2016) |
| Donley |  | Hahn *et al.*(2017) |
| Duval | Hahn *et al.*(2016) | Kraemer *et al.*(2016) |
| Eastland | Hahn *et al.*(2017) | Hahn *et al.*(2017) |
| Edwards | Hahn *et al.*(2017) | Hahn *et al.*(2017) |
| El Paso | Hahn *et al.*(2016) | VectorMap |
| Ellis | Kraemer *et al.*(2016) | Kraemer *et al.*(2016) |
| Erath | Hahn *et al.*(2017) | Hahn *et al.*(2017) |
| Falls | Hahn *et al.*(2016) |  |
| Fayette | Kraemer *et al.*(2016) |  |
| Fisher | Kraemer *et al.*(2016) |  |
| Fort Bend | Kraemer *et al.*(2016) | Kraemer *et al.*(2016) |
| Freestone | Hahn *et al.*(2017) |  |
| Frio | Kraemer *et al.*(2016) | Kraemer *et al.*(2016) |
| Galveston | Kraemer *et al.*(2016) | Kraemer *et al.*(2016) |
| Gillespie | Kraemer *et al.*(2016) |  |
| Goliad | Kraemer *et al.*(2016) |  |
| Gonzales | Kraemer *et al.*(2016) |  |
| Grayson | Hahn *et al.*(2017) | Hahn *et al.*(2017) |
| Gregg | Kraemer *et al.*(2016) |  |
| Guadalupe | Kraemer *et al.*(2016) | Kraemer *et al.*(2016) |
| Hale |  | Hahn *et al.*(2017) |
| Hall | Hahn *et al.*(2017) | Hahn *et al.*(2017) |
| Hamilton | Hahn *et al.*(2017) | Hahn *et al.*(2017) |
| Hardeman | Hahn *et al.*(2017) |  |
| Hardin | Kraemer *et al.*(2016) |  |
| Harris | Hahn *et al.*(2017) | Kraemer *et al.*(2016) |
| Harrison | Kraemer *et al.*(2016) | Kraemer *et al.*(2016) |
| Hays | Kraemer *et al.*(2016) | Kraemer *et al.*(2016) |
| Henderson | Kraemer *et al.*(2016) |  |
| Hidalgo | Kraemer *et al.*(2016) | Kraemer *et al.*(2016) |
| Hill | Hahn *et al.*(2017) | Hahn *et al.*(2017) |
| Hood | Hahn *et al.*(2016) | Hahn *et al.*(2017) |
| Hopkins | Hahn *et al.*(2017) | Hahn *et al.*(2017) |
| Houston | Kraemer *et al.*(2016) |  |
| Howard |  | Hahn *et al.*(2016) |
| Hudspeth |  | Hahn *et al.*(2017) |
| Hunt | Hahn *et al.*(2016) | Hahn *et al.*(2016) |
| Jack |  | Hahn *et al.*(2017) |
| Jackson | Kraemer *et al.*(2016) |  |
| Jasper | Hahn *et al.*(2017) |  |
| Jefferson | Kraemer *et al.*(2016) | Hahn *et al.*(2016) |
| Jim Hogg | Kraemer *et al.*(2016) | Kraemer *et al.*(2016) |
| Jim Wells | Kraemer *et al.*(2016) | Hahn *et al.*(2016) |
| Johnson | Hahn *et al.*(2016) | Kraemer *et al.*(2016) |
| Karnes | Kraemer *et al.*(2016) |  |
| Kaufman | Hahn *et al.*(2016) | Hahn *et al.*(2016) |
| Kendall | Kraemer *et al.*(2016) |  |
| Kenedy |  | Kraemer *et al.*(2016) |
| Kerr | Kraemer *et al.*(2016) |  |
| Kimble | Kraemer *et al.*(2016) |  |
| Kinney | Kraemer *et al.*(2016) | Hahn *et al.*(2017) |
| Kleberg | Kraemer *et al.*(2016) | Kraemer *et al.*(2016) |
| La Salle | Kraemer *et al.*(2016) | Kraemer *et al.*(2016) |
| Lamar | Kraemer *et al.*(2016) |  |
| Lavaca | Kraemer *et al.*(2016) |  |
| Leon | Hahn *et al.*(2017) |  |
| Liberty | Kraemer *et al.*(2016) | Kraemer *et al.*(2016) |
| Limestone | Hahn *et al.*(2017) |  |
| Live Oak | Kraemer *et al.*(2016) |  |
| Lubbock | Kraemer *et al.*(2016) | Hahn *et al.*(2016) |
| Marion | Hahn *et al.*(2017) |  |
| Matagorda | Kraemer *et al.*(2016) |  |
| Maverick | Kraemer *et al.*(2016) | Kraemer *et al.*(2016) |
| McLennan | Kraemer *et al.*(2016) | Kraemer *et al.*(2016) |
| McMullen | Hahn *et al.*(2016) | Kraemer *et al.*(2016) |
| Medina | Kraemer *et al.*(2016) | Hahn *et al.*(2017) |
| Menard | Kraemer *et al.*(2016) |  |
| Midland | Hahn *et al.*(2016) | Kraemer *et al.*(2016) |
| Milam |  | Kraemer *et al.*(2016) |
| Montague | Hahn *et al.*(2017) | Hahn *et al.*(2017) |
| Montgomery | Kraemer *et al.*(2016) | Kraemer *et al.*(2016) |
| Motley |  | Hahn *et al.*(2017) |
| Nacogdoches | Kraemer *et al.*(2016) | Kraemer *et al.*(2016) |
| Navarro | Hahn *et al.*(2016) | Hahn *et al.*(2016) |
| Newton | Hahn *et al.*(2017) |  |
| Nolan | Kraemer *et al.*(2016) |  |
| Nueces | Kraemer *et al.*(2016) | Kraemer *et al.*(2016) |
| Oldham | Hahn *et al.*(2017) |  |
| Orange | Kraemer *et al.*(2016) | Kraemer *et al.*(2016) |
| Palo Pinto | Hahn *et al.*(2017) | Hahn *et al.*(2017) |
| Parker | Hahn *et al.*(2016) | Hahn *et al.*(2016) |
| Polk | Kraemer *et al.*(2016) |  |
| Potter | Hahn *et al.*(2016) |  |
| Presidio |  | Hahn *et al.*(2016) |
| Rains | Hahn *et al.*(2017) |  |
| Randall | Hahn *et al.*(2016) |  |
| Real | Hahn *et al.*(2016) |  |
| Red River | Hahn *et al.*(2017) | Hahn *et al.*(2017) |
| Reeves |  | Hahn *et al.*(2016) |
| Refugio | Kraemer *et al.*(2016) |  |
| Rockwall | Hahn *et al.*(2016) | Hahn *et al.*(2016) |
| Runnels | Kraemer *et al.*(2016) |  |
| Rusk | Kraemer *et al.*(2016) |  |
| San Augustine | Hahn *et al.*(2017) |  |
| San Jacinto | Kraemer *et al.*(2016) |  |
| San Patricio | Kraemer *et al.*(2016) | Kraemer *et al.*(2016) |
| Scurry |  | Hahn *et al.*(2017) |
| Shelby | Kraemer *et al.*(2016) |  |
| Smith | Kraemer *et al.*(2016) | Hahn *et al.*(2016) |
| Starr | Hahn *et al.*(2017) | Kraemer *et al.*(2016) |
| Sterling | Kraemer *et al.*(2016) |  |
| Sutton | Hahn *et al.*(2016) | Hahn *et al.*(2016) |
| Swisher | Hahn *et al.*(2017) |  |
| Tarrant | Kraemer *et al.*(2016) | Kraemer *et al.*(2016) |
| Taylor | Hahn *et al.*(2016) | Kraemer *et al.*(2016) |
| Terry | Kraemer *et al.*(2016) | Hahn *et al.*(2017) |
| Throckmorton |  | Hahn *et al.*(2017) |
| Tom Green | Kraemer *et al.*(2016) | Kraemer *et al.*(2016) |
| Travis | Kraemer *et al.*(2016) | Kraemer *et al.*(2016) |
| Trinity | Hahn *et al.*(2017) |  |
| Tyler | Kraemer *et al.*(2016) |  |
| Upshur | Kraemer *et al.*(2016) |  |
| Uvalde | Kraemer *et al.*(2016) | Kraemer *et al.*(2016) |
| Val Verde | Kraemer *et al.*(2016) | Hahn *et al.*(2016) |
| Van Zandt | Kraemer *et al.*(2016) |  |
| Victoria | Kraemer *et al.*(2016) |  |
| Walker | Kraemer *et al.*(2016) |  |
| Waller | Kraemer *et al.*(2016) |  |
| Webb | Kraemer *et al.*(2016) | Kraemer *et al.*(2016) |
| Wharton | Kraemer *et al.*(2016) |  |
| Wichita | Kraemer *et al.*(2016) | Hahn *et al.*(2016) |
| Willacy | Kraemer *et al.*(2016) | Kraemer *et al.*(2016) |
| Williamson | Kraemer *et al.*(2016) | Hahn *et al.*(2016) |
| Wilson | Kraemer *et al.*(2016) |  |
| Wise | Hahn *et al.*(2017) |  |
| Wood | Kraemer *et al.*(2016) |  |
| Zapata |  | Kraemer *et al.*(2016) |
| Zavala | Kraemer *et al.*(2016) | Hahn *et al.*(2017) |
| Utah |  |  |
| Salt Lake | Neilsen *et al.*(2001) |  |
| Washington |  | Hahn *et al.*(2016) |
| Virginia |  |  |
| Accomack | Hahn *et al.*(2016) |  |
| Albemarle | Kraemer *et al.*(2016) |  |
| Alexandria | Hahn *et al.*(2016) | Hahn *et al.*(2016) |
| Alleghany | Hahn *et al.*(2016) |  |
| Amelia | Hahn *et al.*(2016) |  |
| Amherst | Hahn *et al.*(2016) |  |
| Appomattox | Hahn *et al.*(2016) |  |
| Arlington | Hahn *et al.*(2016) | Hahn *et al.*(2016) |
| Augusta | Hahn *et al.*(2016) |  |
| Bath | Hahn *et al.*(2016) |  |
| Bedford | Hahn *et al.*(2016) |  |
| Bedford City | Kraemer *et al.*(2016) |  |
| Bland | Hahn *et al.*(2016) |  |
| Botetourt | Hahn *et al.*(2016) |  |
| Bristol | Hahn *et al.*(2016) |  |
| Brunswick | Hahn *et al.*(2016) |  |
| Buchanan | Hahn *et al.*(2016) |  |
| Buckingham | Hahn *et al.*(2016) |  |
| Buena Vista | Hahn *et al.*(2016) |  |
| Campbell | Hahn *et al.*(2016) |  |
| Caroline | VectorMap | Hahn *et al.*(2016) |
| Carroll | Hahn *et al.*(2016) |  |
| Charles City | Hahn *et al.*(2016) |  |
| Charlotte | Hahn *et al.*(2016) |  |
| Charlottesville | Hahn *et al.*(2016) |  |
| Chesapeake | Kraemer *et al.*(2016) |  |
| Chesterfield | Kraemer *et al.*(2016) | Hahn *et al.*(2016) |
| Clarke | Hahn *et al.*(2016) |  |
| Colonial Heights | Hahn *et al.*(2016) |  |
| Covington | Hahn *et al.*(2016) |  |
| Craig | Hahn *et al.*(2016) |  |
| Culpeper | Hahn *et al.*(2016) |  |
| Cumberland | Hahn *et al.*(2016) |  |
| Danville | Hahn *et al.*(2016) |  |
| Dickenson | Hahn *et al.*(2016) |  |
| Dinwiddie | Hahn *et al.*(2016) |  |
| Emporia | Hahn *et al.*(2016) |  |
| Essex | Hahn *et al.*(2016) |  |
| Fairfax | Hahn *et al.*(2016) | Hahn *et al.*(2016) |
| Fairfax City | Hahn *et al.*(2016) | Kraemer *et al.*(2016) |
| Falls Chruch | Hahn *et al.*(2016) |  |
| Fauquier | Hahn *et al.*(2016) |  |
| Floyd | Hahn *et al.*(2016) |  |
| Fluvanna | Hahn *et al.*(2016) |  |
| Franklin | Hahn *et al.*(2016) |  |
| Franklin City | Hahn *et al.*(2016) |  |
| Frederick | Hahn *et al.*(2016) |  |
| Fredericksburg | Hahn *et al.*(2016) |  |
| Galax | Hahn *et al.*(2016) |  |
| Giles | Hahn *et al.*(2016) |  |
| Gloucester | Kraemer *et al.*(2016) |  |
| Goochland | Hahn *et al.*(2016) |  |
| Grayson | Hahn *et al.*(2016) |  |
| Greene | Hahn *et al.*(2016) |  |
| Greensville | Hahn *et al.*(2016) |  |
| Halifax | Hahn *et al.*(2016) |  |
| Hampton | Kraemer *et al.*(2016) |  |
| Hanover | Hahn *et al.*(2016) |  |
| Harrisonburg | Hahn *et al.*(2016) |  |
| Henrico | Hahn *et al.*(2016) |  |
| Henry | Hahn *et al.*(2016) |  |
| Highland | Hahn *et al.*(2016) |  |
| Hopewell | Hahn *et al.*(2016) |  |
| Isle of Wight | ArboNET |  |
| James City | Kraemer *et al.*(2016) |  |
| King and Queen | Hahn *et al.*(2016) |  |
| King George | Hahn *et al.*(2016) |  |
| King William | Hahn *et al.*(2016) |  |
| Lancaster | Hahn *et al.*(2016) |  |
| Lee | Kraemer *et al.*(2016) |  |
| Lexington | Hahn *et al.*(2016) |  |
| Loudoun | Hahn *et al.*(2016) | Hahn *et al.*(2016) |
| Louisa | Hahn *et al.*(2016) |  |
| Lunenburg | Hahn *et al.*(2016) |  |
| Lynchburg city | Hahn *et al.*(2016) |  |
| Madison | Hahn *et al.*(2016) |  |
| Manassas City | Kraemer *et al.*(2016) |  |
| Manassas Park City | Hahn *et al.*(2016) |  |
| Martinsville | Hahn *et al.*(2016) |  |
| Mathews | Hahn *et al.*(2016) |  |
| Mecklenburg | Hahn *et al.*(2016) |  |
| Middlesex | Hahn *et al.*(2016) |  |
| Montgomery | Hahn *et al.*(2016) |  |
| Nelson | Kraemer *et al.*(2016) |  |
| New Kent | Kraemer *et al.*(2016) |  |
| Newport News | Kraemer *et al.*(2016) |  |
| Norfolk | Hahn *et al.*(2016) |  |
| Northampton | Hahn *et al.*(2016) |  |
| Northumberland | Hahn *et al.*(2016) |  |
| Norton | Kraemer *et al.*(2016) |  |
| Nottoway | Kraemer *et al.*(2016) | Hahn *et al.*(2016) |
| Orange | Hahn *et al.*(2016) |  |
| Page | Hahn *et al.*(2016) |  |
| Patrick | Hahn *et al.*(2016) |  |
| Petersburg | Hahn *et al.*(2016) |  |
| Pittsylvania | Hahn *et al.*(2016) |  |
| Poquoson City | Hahn *et al.*(2016) |  |
| Portsmouth | Hahn *et al.*(2016) |  |
| Powhatan | Hahn *et al.*(2016) |  |
| Prince Edward | Hahn *et al.*(2016) |  |
| Prince George | Hahn *et al.*(2016) | VectorMap |
| Prince William | Kraemer *et al.*(2016) |  |
| Pulaski | Hahn *et al.*(2016) |  |
| Radford | Hahn *et al.*(2016) |  |
| Rappahannock | Hahn *et al.*(2016) |  |
| Richmond | Hahn *et al.*(2016) |  |
| Richmond City | Kraemer *et al.*(2016) |  |
| Roanoke | Hahn *et al.*(2016) |  |
| Roanoke City | Kraemer *et al.*(2016) |  |
| Rockbridge | Hahn *et al.*(2016) |  |
| Rockingham | Hahn *et al.*(2016) | Hahn *et al.*(2016) |
| Russell | Hahn *et al.*(2016) |  |
| Salem | Kraemer *et al.*(2016) |  |
| Scott | Kraemer *et al.*(2016) |  |
| Shenandoah | Hahn *et al.*(2016) |  |
| Smyth | Hahn *et al.*(2016) |  |
| Southampton | ArboNET |  |
| Spotsylvania | Kraemer *et al.*(2016) |  |
| Stafford | Hahn *et al.*(2016) |  |
| Staunton | Hahn *et al.*(2016) |  |
| Suffolk | Kraemer *et al.*(2016) | Hahn *et al.*(2016) |
| Surry | Hahn *et al.*(2016) |  |
| Sussex | Hahn *et al.*(2016) |  |
| Tazewell | Hahn *et al.*(2016) |  |
| Virginia Beach | Kraemer *et al.*(2016) |  |
| Warren | Hahn *et al.*(2016) |  |
| Washington | Hahn *et al.*(2016) |  |
| Waynesboro | Hahn *et al.*(2016) |  |
| Westmoreland | Kraemer *et al.*(2016) |  |
| Williamsburg | Kraemer *et al.*(2016) |  |
| Winchester | Hahn *et al.*(2016) |  |
| Wise | Kraemer *et al.*(2016) |  |
| Wythe | Hahn *et al.*(2016) |  |
| York | Hahn *et al.*(2017) |  |
| Washington |  |  |
| Pacific | Hahn *et al.*(2016) |  |
| West Virginia |  |  |
| Barbour | Hahn *et al.*(2016) |  |
| Berkeley | Hahn *et al.*(2016) |  |
| Boone | Kraemer *et al.*(2016) |  |
| Braxton | Hahn *et al.*(2016) |  |
| Cabell | Kraemer *et al.*(2016) |  |
| Calhoun | Hahn *et al.*(2016) |  |
| Clay | ArboNET |  |
| Fayette | Hahn *et al.*(2016) |  |
| Gilmer | Hahn *et al.*(2016) |  |
| Greenbrier | Hahn *et al.*(2016) |  |
| Harrison | Hahn *et al.*(2016) |  |
| Jackson | Hahn *et al.*(2016) |  |
| Jefferson | Hahn *et al.*(2016) |  |
| Kanawha | Kraemer *et al.*(2016) |  |
| Lincoln | Kraemer *et al.*(2016) |  |
| Logan | Hahn *et al.*(2016) |  |
| Marion | Hahn *et al.*(2016) |  |
| Mason | Hahn *et al.*(2016) |  |
| McDowell | Hahn *et al.*(2016) |  |
| Mercer | ArboNET |  |
| Mingo | Kraemer *et al.*(2016) |  |
| Monongalia | Hahn *et al.*(2016) |  |
| Monroe | Hahn *et al.*(2016) |  |
| Morgan | Hahn *et al.*(2016) |  |
| Nicholas | Kraemer *et al.*(2016) |  |
| Putnam | Kraemer *et al.*(2016) |  |
| Raleigh | Hahn *et al.*(2016) |  |
| Roane | Hahn *et al.*(2016) |  |
| Taylor | Hahn *et al.*(2016) |  |
| Tucker | Hahn *et al.*(2016) |  |
| Tyler | Hahn *et al.*(2016) |  |
| Upshur | Hahn *et al.*(2016) |  |
| Wayne | Hahn *et al.*(2016) |  |
| Webster | Hahn *et al.*(2016) |  |
| Wetzel | Hahn *et al.*(2016) |  |
| Wirt | Hahn *et al.*(2016) |  |
| Wood | Kraemer *et al.*(2016) |  |
| Wyoming | Hahn *et al.*(2016) |  |

Counties from which no records were obtained are either not listed or the sources field is blank.

**References**

Centers for Disease Control and Prevention. 2015. ArboNET Database. (<http://www.cdc.gov/westnile/resourcepages/survResources.html>), accessed 03.20.2017.

**Foley, D., P. Rueda, and R. Wilkerson. 2016.** VectorMap. Walter Reed Biosyst. Unit. (<http://vectormap.si.edu/index.htm>), accessed 03.01.2017.

**Hahn, M.B., L.Eisen, J. McAllister, H. Savage, J.-P. Mutebi, R.J. Eisen. 2017.** Updated reported distribution of *Aedes* (*Stegomyia*) *aegypti* and *Aedes* (*Stegomyia*) *albopictus* in the United States, 1995-2016 (Diptera: Culicidae), J. Med. Entomol., in press.

**Hahn, M. B., Eisen, R. J., Eisen, L., Boegler, K. A., Moore, C. G., McAllister, J., Savage, H. M. and Mutebi, J. P. 2016.** Reported Distribution of *Aedes* (*Stegomyia*) *aegypti* and *Aedes* (*Stegomyia*) *albopictus* in the United States, 1995-2016 (Diptera: Culicidae). J Med Entomol. 53: 1169-1175.

**Kraemer, M. U. G., M. E. Sinka, K. a. Duda, A. Mylne, F. M. Shearer, O. J. Brady, J. P. Messina, C. M. Barker, C. G. Moore, R. G. Carvalho, G. E. Coelho, W. Van Bortel, G. Hendrickx, F. Schaffner, G. R. W. Wint, I. R. F. Elyazar, H.-J. Teng, and S. I. Hay. 2015.** The global compendium of *Aedes aegypti* and *Ae. albopictus* occurrence. Nature. 2: 150035.

**Neilsen L.T., R.J. Brand, G.C. Collett. 2001.** An identification guide to the mosquitoes of Utah. Utah Mosquito Abatement Association. Salt Lake City, Utah.
